# Supplementary material for: Coagulation disorders during treatment with cefazolin and rifampicin: rare but dangerous
Source: J Bone Jt Infect. 2021 Apr 1;6(5):131–4. doi: 10.5194/jbji-6-131-2021 (PMC8131959; doi:10.5194/jbji-6-131-2021)
Supplement: The supplement related to this article is available online at: https://doi.org/10.5194/jbji-6-131-2021-supplement. [file jbji-6-131-supplement.zip › jbji-6-131-2021-supplement-title-page.pdf]

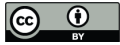

## *Supplement of*

# **Coagulation disorders during treatment with cefazolin and rifampicin: rare but dangerous**

**Ines Kouki et al.**

*Correspondence to:* Clémence Montagner ([cmontagner@hopital-dcss.org](mailto:cmontagner@hopital-dcss.org))

- [jbji-6-131-2021-supplement-title-page.pdf](#)
- [FigureS1.pdf](#)
- [FigureS2.pdf](#)

The copyright of individual parts of the supplement might differ from the article licence.
